# Supplementary material
Source: HighWire-hosted journal article supplement (https://bmjleader.bmj.com/highwire/filestream/1645/field_highwire_adjunct_files/2/leader-2020-000224supp003_data_supplement.pdf)
Supplement: leader-2020-000224supp003_data_supplement.pdf [file leader-2020-000224supp003_data_supplement.pdf]

**Supplementary file 3. Structure of citation and reference search**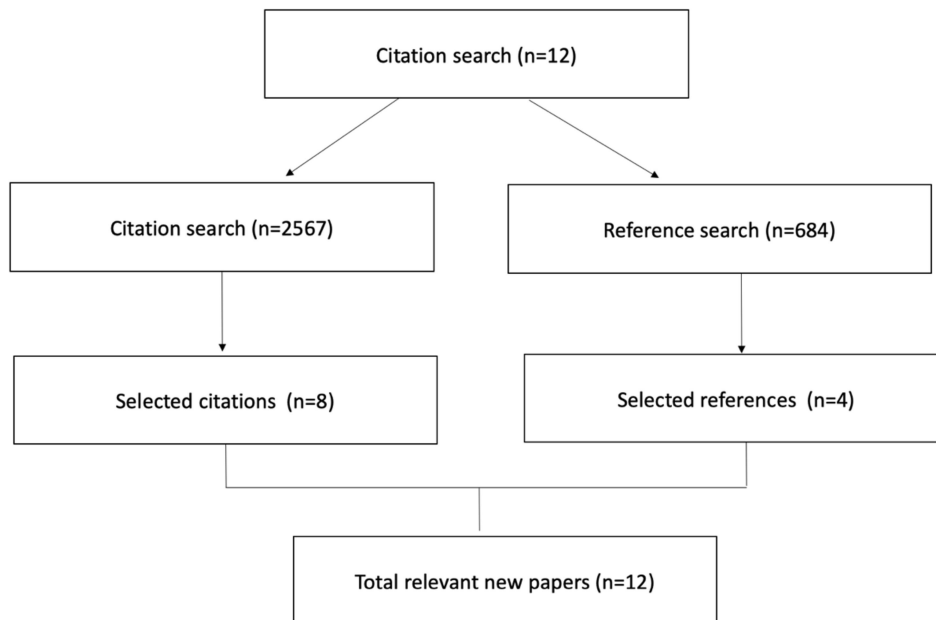

**Supplementary file 3\_Table1. Citations and references from selected papers**

| <b>Paper sourced in database search</b>           | <b>References</b> | <b>Selected and included references</b>                                                                                                                                                                                                                                                                                                                                                                                                            | <b>Citations</b> | <b>Selected and included citations</b>                                                                                                                                                                                                                |
|---------------------------------------------------|-------------------|----------------------------------------------------------------------------------------------------------------------------------------------------------------------------------------------------------------------------------------------------------------------------------------------------------------------------------------------------------------------------------------------------------------------------------------------------|------------------|-------------------------------------------------------------------------------------------------------------------------------------------------------------------------------------------------------------------------------------------------------|
| Morland & Pettersen, 2018                         | 35                | 0                                                                                                                                                                                                                                                                                                                                                                                                                                                  | 1                | 0                                                                                                                                                                                                                                                     |
| Björkquist, C., Forss, M., & Samuelson, F., 2018. | 36                | Segar J, Rogers A, Salisbury C, Thomas C. Roles and identities in transition: boundaries of work and inter-professional relationships at the interface between telehealth and primary care. <i>Health Soc Care Community</i> 2013; 21: 606–13.<br><br>Gagnon M-P, Lamothe L, Fortin J-P, Cloutier A, Godin G, Gagné C, Reinharz D. Telehealth adoption in hospitals: an organisational perspective. <i>J Health Organ Manage</i> 2005; 19: 32– 56. | 3                | 0                                                                                                                                                                                                                                                     |
| Swinkels et al., 2018                             | 34                | 0                                                                                                                                                                                                                                                                                                                                                                                                                                                  | 17               | 0                                                                                                                                                                                                                                                     |
| Tintorer, D.L., et al., 2018                      | 92                | 0                                                                                                                                                                                                                                                                                                                                                                                                                                                  | 1                | 0                                                                                                                                                                                                                                                     |
| Randell et al., 2019                              | 41                | 0                                                                                                                                                                                                                                                                                                                                                                                                                                                  | 0                | 0                                                                                                                                                                                                                                                     |
| Beane, 2019                                       | 62                | 0                                                                                                                                                                                                                                                                                                                                                                                                                                                  | 23               | Pelikan, H. R., Cheatle, A., Jung, M. F., & Jackson, S. J. (2018). Operating at a Distance-How a Teleoperated Surgical Robot Reconfigures Teamwork in the Operating Room. <i>Proceedings of the ACM on Human-Computer Interaction</i> , 2(CSCW), 138. |
| Black, Carlile, Repenning, 2004                   | 62                | 0                                                                                                                                                                                                                                                                                                                                                                                                                                                  | 208              | 0                                                                                                                                                                                                                                                     |
| Edmonson, Bohemer, Pisano, 2001                   | 61                | 0                                                                                                                                                                                                                                                                                                                                                                                                                                                  | 1720             | Stevens, M., & van Schaik, J. (2019). Implementing new technologies for complex care: The role of embeddedness factors in team learning. <i>Journal of Operations Management</i> .                                                                    |

|                      |    |                                                                                                                                                                                                                                                                                                                                                         |     |                                                                                                                                                                                                                                                                                                                                                                                                                                                                                                                                                                                                                                                                                                                                                                                                                                                                                    |
|----------------------|----|---------------------------------------------------------------------------------------------------------------------------------------------------------------------------------------------------------------------------------------------------------------------------------------------------------------------------------------------------------|-----|------------------------------------------------------------------------------------------------------------------------------------------------------------------------------------------------------------------------------------------------------------------------------------------------------------------------------------------------------------------------------------------------------------------------------------------------------------------------------------------------------------------------------------------------------------------------------------------------------------------------------------------------------------------------------------------------------------------------------------------------------------------------------------------------------------------------------------------------------------------------------------|
|                      |    |                                                                                                                                                                                                                                                                                                                                                         |     |                                                                                                                                                                                                                                                                                                                                                                                                                                                                                                                                                                                                                                                                                                                                                                                                                                                                                    |
| Barret et al., 2012  | 54 | <p>Barley, S. R. 1986. Technology as an occasion for structuring: Evidence from observations of CT scanners and the social order of radiology departments. <i>Admin. Sci. Quart.</i> 31(1) 78–108.</p> <p>Burri, R. V. (2008). Doing distinctions: Boundary work and symbolic capital in radiology. <i>Social Studies of Science</i>, 38(1), 35-62.</p> | 163 | <p>Petrakaki, D., Klecun, E., &amp; Cornford, T. (2016). Changes in healthcare professional work afforded by technology: The introduction of a national electronic patient record in an English hospital. <i>Organization</i>, 23(2), 206-226.</p> <p>Petrakaki, D., &amp; Kornelakis, A. (2016). 'We can only request what's in our protocol': technology and work autonomy in healthcare. <i>New Technology, Work and Employment</i>, 31(3), 223-237.</p> <p>Sergeeva, A., Huysman, M., &amp; Faraj, S. (2015). Transforming work practices of operating room teams: the case of the Da Vinci robot.</p> <p>Bergey, M. R., Goldsack, J. C., &amp; Robinson, E. J. (2019). Invisible work and changing roles: Health information technology implementation and reorganization of work practices for the inpatient nursing team. <i>Social Science &amp; Medicine</i>, 112387.</p> |
| Gherardi, 2010       | 64 | 0                                                                                                                                                                                                                                                                                                                                                       | 141 |                                                                                                                                                                                                                                                                                                                                                                                                                                                                                                                                                                                                                                                                                                                                                                                                                                                                                    |
| Korica & Moloy, 2010 | 75 | 0                                                                                                                                                                                                                                                                                                                                                       | 95  | <p>Mathieu-Fritz A, Esterle L, Matthews T. Changes in Professional Practices During Medical Teleconsultations. <i>Revue française de sociologie</i>. 2013;54(2):303-29.</p>                                                                                                                                                                                                                                                                                                                                                                                                                                                                                                                                                                                                                                                                                                        |
| Nicolini, 2007       | 68 | 0                                                                                                                                                                                                                                                                                                                                                       | 195 | <p>Meyer, J., &amp; Paré, G. (2017). The Transformative Role of Telemedicine on Coordination: A Practice Approach.</p>                                                                                                                                                                                                                                                                                                                                                                                                                                                                                                                                                                                                                                                                                                                                                             |
